# Supplementary material for: Constructing disease-specific gene networks using pair-wise relevance metric: Application to colon cancer identifies interleukin 8, desmin and enolase 1 as the central elements
Source: Springer Nature journal article supplement (doi:10.1186/1752-0509-2-72), 2008-08-10
Supplement: 12918_2007_229_MOESM1_ESM.pdf [file 12918_2007_229_MOESM1_ESM.pdf]

**Table 1.** The *AFV* values of the 200 colon cancer-specific gene interactions

| Gene<br>(Symbol or Accession number) | Gene<br>(Symbol or Accession number) | <i>AFV</i> | <i>p</i> |
|--------------------------------------|--------------------------------------|------------|----------|
| R39465                               | IL8                                  | 19.144     | 0.0001   |
| <b>DES</b>                           | <b>MORF4L2</b>                       | 10.233     | 0.0001   |
| <b>EPHB4</b>                         | <b>IL8</b>                           | 9.529      | 0.0001   |
| <b>RBM9</b>                          | <b>IL8</b>                           | 9.4601     | 0.0001   |
| R39465                               | DES                                  | 8.4874     | 0.0001   |
| <b>RPL30</b>                         | <b>DES</b>                           | 8.3669     | 0.0001   |
| <b>ENO1</b>                          | <b>IL8</b>                           | 7.544      | 0.0001   |
| RPL30                                | R87126                               | 5.9911     | 0.0001   |
| <b>EIF2S2</b>                        | <b>IL8</b>                           | 5.8792     | 0.0001   |
| <b>RPL30</b>                         | <b>MORF4L2</b>                       | 5.2267     | 0.0001   |
| R39465                               | DES                                  | 5.225      | 0.0001   |
| R39465                               | ENO1                                 | 4.9874     | 0.0001   |
| R39465                               | RPL30                                | 4.8273     | 0.0001   |
| R39465                               | MORF4L2                              | 4.5364     | 0.0001   |
| <b>RBM9</b>                          | <b>DES</b>                           | 4.3832     | 0.0002   |
| <b>IL1R2</b>                         | <b>IL8</b>                           | 4.3401     | 0.0002   |
| <b>TPT1</b>                          | <b>DES</b>                           | 4.032      | 0.0002   |
| RBM9                                 | R39465                               | 4.0199     | 0.0002   |
| <b>MAOB</b>                          | <b>IL8</b>                           | 3.9786     | 0.0002   |
| <b>F13A1</b>                         | <b>IL8</b>                           | 3.7152     | 0.0002   |
| <b>DES</b>                           | <b>PRPS1</b>                         | 3.6945     | 0.0002   |
| <b>DES</b>                           | <b>IL8</b>                           | 3.6928     | 0.0002   |
| <b>TPM1</b>                          | <b>IL8</b>                           | 3.6394     | 0.0002   |
| ENO1                                 | R87126                               | 3.5947     | 0.0002   |
| <b>CD37</b>                          | <b>DES</b>                           | 3.5878     | 0.0002   |
| RY1                                  | IL8                                  | 3.5482     | 0.0002   |
| <b>DES</b>                           | <b>MYH9</b>                          | 3.5344     | 0.0002   |
| <b>RPL30</b>                         | <b>IL8</b>                           | 3.4501     | 0.0002   |
| <b>NK4</b>                           | <b>IL8</b>                           | 3.4053     | 0.0002   |
| R39465                               | F13A1                                | 3.3072     | 0.0002   |
| DES                                  | NEUGRIN                              | 3.2934     | 0.0002   |
| <b>EPHB4</b>                         | <b>IL1R2</b>                         | 3.0352     | 0.0002   |
| R39465                               | MAOB                                 | 2.987      | 0.0002   |
| <b>PRPS1</b>                         | <b>IL8</b>                           | 2.875      | 0.0002   |
| <b>RBM9</b>                          | <b>MYH9</b>                          | 2.789      | 0.0002   |
| RPS29                                | R87126                               | 2.7356     | 0.0003   |
| <b>ENO1</b>                          | <b>F13A1</b>                         | 2.6857     | 0.0003   |
| R39465                               | RY1                                  | 2.6753     | 0.0003   |
| R39465                               | RPL30                                | 2.6375     | 0.0003   |
| R39465                               | NEUGRIN                              | 2.6134     | 0.0003   |
| <b>ACTB</b>                          | <b>IL8</b>                           | 2.591      | 0.0003   |
| <b>RBM9</b>                          | <b>RPL30</b>                         | 2.572      | 0.0003   |
| <b>FGFR2</b>                         | <b>IL8</b>                           | 2.5204     | 0.0003   |
| <b>ACTB</b>                          | <b>EIF2S2</b>                        | 2.4119     | 0.0003   |
| R87126                               | AP3B2                                | 2.4016     | 0.0005   |
| R39465                               | FGFR2                                | 2.2966     | 0.0005   |
| <b>DES</b>                           | <b>PLAUR</b>                         | 2.1726     | 0.0007   |
| <b>RBM9</b>                          | <b>IL1R2</b>                         | 2.1589     | 0.0007   |
| R02593                               | DES                                  | 2.1554     | 0.0007   |
| R87126                               | EPHB3                                | 2.1038     | 0.0007   |
| R87126                               | C15orf15                             | 2.0797     | 0.0007   |
| <b>HLA-B</b>                         | <b>IL8</b>                           | 2.0642     | 0.0007   |
| <b>RBM9</b>                          | <b>EPHB4</b>                         | 1.9729     | 0.0008   |

|               |                |        |        |
|---------------|----------------|--------|--------|
| <b>IL8</b>    | <b>FUT1</b>    | 1.923  | 0.0008 |
| R78934        | IL8            | 1.9041 | 0.0008 |
| R39465        | EPHB4          | 1.8404 | 0.0008 |
| IL8           | MEP50          | 1.8318 | 0.0008 |
| R39465        | R87126         | 1.83   | 0.0008 |
| <b>RBM9</b>   | <b>FGFR2</b>   | 1.818  | 0.0008 |
| <b>RBM9</b>   | <b>CD37</b>    | 1.8128 | 0.0008 |
| <b>CD37</b>   | <b>MYH9</b>    | 1.7457 | 0.0008 |
| R02593        | PLAUR          | 1.725  | 0.0008 |
| <b>DES</b>    | <b>KIF5A</b>   | 1.713  | 0.0008 |
| H80240        | IL8            | 1.7026 | 0.0008 |
| R87126        | LOC440918      | 1.6803 | 0.0008 |
| RBM9          | R87126         | 1.5856 | 0.0011 |
| <b>SRF</b>    | <b>DES</b>     | 1.5753 | 0.0011 |
| R39465        | TPM1           | 1.5546 | 0.0011 |
| <b>PLAUR</b>  | <b>MORF4L2</b> | 1.5529 | 0.0011 |
| <b>RPL30</b>  | <b>IFITM2</b>  | 1.5288 | 0.0011 |
| <b>IFITM2</b> | <b>DES</b>     | 1.5288 | 0.0011 |
| <b>RPL30</b>  | <b>CD37</b>    | 1.4324 | 0.0012 |
| <b>RBM9</b>   | <b>EIF2S2</b>  | 1.3979 | 0.0014 |
| <b>TNNC1</b>  | <b>IL8</b>     | 1.3532 | 0.0016 |
| R39465        | TNNC1          | 1.3325 | 0.0018 |
| <b>TPT1</b>   | <b>RPL30</b>   | 1.3308 | 0.0018 |
| R39465        | EPHB3          | 1.3291 | 0.0018 |
| <b>RPS29</b>  | <b>IL8</b>     | 1.3291 | 0.0018 |
| R02593        | MORF4L2        | 1.3118 | 0.0018 |
| DES           | RY1            | 1.2981 | 0.0018 |
| <b>RPLP1</b>  | <b>IL8</b>     | 1.2929 | 0.0019 |
| R39465        | NEUGRIN        | 1.2809 | 0.0021 |
| <b>NK4</b>    | <b>EPHB4</b>   | 1.2671 | 0.0023 |
| T72863        | IL8            | 1.243  | 0.0023 |
| <b>EEF1G</b>  | <b>IL8</b>     | 1.2378 | 0.0023 |
| H87344        | IL8            | 1.2292 | 0.0023 |
| * <b>RPS9</b> | <b>DES</b>     | 1.2189 | 0.0023 |
| <b>RBM9</b>   | <b>ENO1</b>    | 1.2086 | 0.0023 |
| HNRPA1        | RY1            | 1.1776 | 0.0024 |
| <b>RPL37</b>  | <b>IL8</b>     | 1.1517 | 0.0024 |
| R39465        | MYL9           | 1.1483 | 0.0024 |
| <b>TPT1</b>   | <b>MORF4L2</b> | 1.1466 | 0.0024 |
| R39465        | MEP50          | 1.1362 | 0.0025 |
| RPS29         | C15orf15       | 1.1294 | 0.0025 |
| RPL30         | H40095         | 1.0966 | 0.0026 |
| <b>CANX</b>   | <b>IL8</b>     | 1.0657 | 0.0026 |
| <b>RPS29</b>  | <b>AP3B2</b>   | 1.0639 | 0.0026 |
| <b>OPHN1</b>  | <b>IL8</b>     | 1.0588 | 0.0026 |
| R39465        | T72863         | 1.0553 | 0.0026 |
| R39465        | RY1            | 1.0519 | 0.0026 |
| <b>NK4</b>    | <b>EEF1G</b>   | 1.0519 | 0.0026 |
| <b>RPS9</b>   | <b>MORF4L2</b> | 1.033  | 0.0029 |
| <b>RPS29</b>  | <b>RPL30</b>   | 1.0278 | 0.0029 |
| <b>RPS29</b>  | <b>ENO1</b>    | 0.9985 | 0.0032 |
| <b>RPL30</b>  | <b>AP3B2</b>   | 0.9968 | 0.0032 |
| <b>RBM9</b>   | <b>KIF5A</b>   | 0.9968 | 0.0032 |
| DES           | MEP50          | 0.9779 | 0.0032 |
| <b>IL8</b>    | <b>ATF4</b>    | 0.971  | 0.0033 |
| R39465        | PRPS1          | 0.9434 | 0.0035 |
| R78934        | EPHB4          | 0.9417 | 0.0035 |

|                |               |        |        |
|----------------|---------------|--------|--------|
| <b>MT1G</b>    | <b>IL8</b>    | 0.9331 | 0.0036 |
| <b>BCL3</b>    | <b>HNRPA1</b> | 0.9297 | 0.0036 |
| BCL3           | RY1           | 0.9297 | 0.0036 |
| TPM1           | RY1           | 0.9056 | 0.0036 |
| T74906         | EIF2S2        | 0.9021 | 0.0036 |
| T74906         | IL8           | 0.9021 | 0.0036 |
| MAOB           | RY1           | 0.897  | 0.0036 |
| TMSB4X         | MEP50         | 0.8849 | 0.0036 |
| <b>NK4</b>     | <b>FUT1</b>   | 0.8849 | 0.0036 |
| R39465         | IFITM2        | 0.8763 | 0.0036 |
| R39465         | OPHN1         | 0.8728 | 0.0036 |
| <b>RPL30</b>   | <b>EPHB3</b>  | 0.8728 | 0.0036 |
| <b>* DES</b>   | <b>RPS9</b>   | 0.8677 | 0.0036 |
| H73908         | IL8           | 0.8608 | 0.0036 |
| <b>A2M</b>     | <b>IL8</b>    | 0.8591 | 0.0037 |
| R39465         | R39465        | 0.8556 | 0.0037 |
| <b>NFIA</b>    | <b>IL8</b>    | 0.8401 | 0.0037 |
| <b>ENO1</b>    | <b>DES</b>    | 0.8264 | 0.0039 |
| <b>DES</b>     | <b>HNRPD</b>  | 0.8264 | 0.0039 |
| NEUGRIN        | PRPS1         | 0.8264 | 0.0039 |
| <b>DES</b>     | <b>PHKG2</b>  | 0.8212 | 0.0041 |
| R39465         | BCL3          | 0.8057 | 0.0041 |
| R39465         | HNRPA1        | 0.8057 | 0.0041 |
| <b>ENO1</b>    | <b>AP3B2</b>  | 0.7902 | 0.0045 |
| <b>HLA-B</b>   | <b>EIF2S2</b> | 0.7833 | 0.0045 |
| RPS3           | R87126        | 0.7799 | 0.0045 |
| <b>RPS29</b>   | <b>HSPD1</b>  | 0.7782 | 0.0045 |
| R39465         | SRF           | 0.7764 | 0.0045 |
| R87126         | RY1           | 0.7678 | 0.0045 |
| <b>RBM9</b>    | <b>MAOB</b>   | 0.7678 | 0.0045 |
| <b>ENO1</b>    | <b>EPHB4</b>  | 0.7627 | 0.0046 |
| <b>TPM1</b>    | <b>EPHB4</b>  | 0.7609 | 0.0046 |
| <b>RPL30</b>   | <b>MAOB</b>   | 0.7403 | 0.0047 |
| <b>ZFP36L1</b> | <b>IL8</b>    | 0.7317 | 0.0047 |
| <b>RPS9</b>    | <b>MYH9</b>   | 0.7231 | 0.0048 |
| <b>SRF</b>     | <b>IL8</b>    | 0.7231 | 0.0048 |
| ZFP36L1        | MEP50         | 0.7231 | 0.0048 |
| <b>ENO1</b>    | <b>MAOB</b>   | 0.7196 | 0.0048 |
| <b>TNNC1</b>   | <b>EPHB4</b>  | 0.7179 | 0.0050 |
| <b>ENO1</b>    | <b>TPM1</b>   | 0.7162 | 0.0050 |
| <b>PRTN3</b>   | <b>IL8</b>    | 0.7093 | 0.0050 |
| <b>RPL30</b>   | <b>FGFR2</b>  | 0.699  | 0.0051 |
| <b>DES</b>     | <b>ACTA1</b>  | 0.6972 | 0.0051 |
| <b>RPL30</b>   | <b>KIF5A</b>  | 0.6938 | 0.0051 |
| RPS9           | R87126        | 0.6852 | 0.0054 |
| R39465         | UBTF          | 0.6749 | 0.0060 |
| <b>EPHB4</b>   | <b>UBTF</b>   | 0.6749 | 0.0060 |
| <b>TPM1</b>    | <b>PRPS1</b>  | 0.6749 | 0.0060 |
| <b>UBTF</b>    | <b>IL8</b>    | 0.6749 | 0.0060 |
| R87126         | H40095        | 0.6714 | 0.0062 |
| <b>EIF2S2</b>  | <b>IL1R2</b>  | 0.6714 | 0.0062 |
| C15orf15       | IL8           | 0.6714 | 0.0062 |
| T72863         | R87126        | 0.6559 | 0.0063 |
| RBM9           | NEUGRIN       | 0.6525 | 0.0064 |
| SRF            | NEUGRIN       | 0.6525 | 0.0064 |
| <b>ENO1</b>    | <b>EPHB3</b>  | 0.6525 | 0.0064 |
| <b>CPSF1</b>   | <b>IL8</b>    | 0.6525 | 0.0064 |

|                |               |        |        |
|----------------|---------------|--------|--------|
| <b>CPSF1</b>   | <b>FUT1</b>   | 0.6525 | 0.0064 |
| TPT1           | R87126        | 0.6353 | 0.0072 |
| MEP50          | H64807        | 0.6353 | 0.0072 |
| <b>MORF4L2</b> | <b>MYL9</b>   | 0.6301 | 0.0073 |
| R39465         | MYL9          | 0.6267 | 0.0074 |
| ACTB           | MEP50         | 0.6198 | 0.0074 |
| <b>RBM9</b>    | <b>PHKG2</b>  | 0.6129 | 0.0074 |
| <b>ACTB</b>    | <b>ENO1</b>   | 0.6094 | 0.0074 |
| <b>ENO1</b>    | <b>EIF2S2</b> | 0.6094 | 0.0074 |
| <b>RPL30</b>   | <b>MYH9</b>   | 0.6043 | 0.0074 |
| <b>RPLP1</b>   | <b>EIF2S2</b> | 0.6043 | 0.0074 |
| <b>RBM9</b>    | <b>NFIA</b>   | 0.594  | 0.0074 |
| <b>RBM9</b>    | <b>EPHB3</b>  | 0.5888 | 0.0075 |
| DES            | C15orf15      | 0.5871 | 0.0077 |
| T99080         | IL8           | 0.5871 | 0.0077 |
| <b>CHIT1</b>   | <b>MYL9</b>   | 0.5853 | 0.0078 |
| <b>ACTB</b>    | <b>RPLP1</b>  | 0.5819 | 0.0080 |
| R39465         | EIF2S2        | 0.5819 | 0.0080 |
| R02593         | ENO1          | 0.5785 | 0.0081 |
| <b>ENO1</b>    | <b>MYL9</b>   | 0.5785 | 0.0081 |
| <b>HLA-B</b>   | <b>RPL37</b>  | 0.5698 | 0.0087 |
| R87126         | MEP50         | 0.5681 | 0.0087 |
| H80240         | MEP50         | 0.5664 | 0.0087 |
| 1108           | C15orf15      | 0.5647 | 0.0087 |
| <b>ENO1</b>    | <b>FUT1</b>   | 0.5595 | 0.0090 |
| T65938         | NEUGRIN       | 0.5526 | 0.0093 |
| R39465         | T65938        | 0.5457 | 0.0097 |
| RBM9           | MEP50         | 0.544  | 0.0097 |
| GYPA           | R87126        | 0.5423 | 0.0097 |
| R39465         | CSRP1         | 0.5371 | 0.0098 |
| CSRP1          | NEUGRIN       | 0.5371 | 0.0098 |
| SRF            | H73908        | 0.5371 | 0.0098 |
| <b>TMSB4X</b>  | <b>IL8</b>    | 0.5371 | 0.0098 |

We only focused on the 52 genes whose functions are well characterized and documented in Gene Ontology. There are 109 significant gene-gene interactions in bold type among these 52 known genes. '\*' indicates that the two interactions are same because the two probes correspond to the same gene, RPS9.
